# Supplementary material
Source: publisher figshare collection journal article supplement (https://gsajournals.figshare.com/ndownloader/files/22312026)
Supplement: Supplementary file 1 [file 22312026]

## Sheet: Sheet1
S3 Table: List of genes and number of samples containing SNPs in the ILEs
gene_id	gene_name	sample_count
YDR261W-B	NA	7
YMR321C	NA	7
YJR161C	COS5	6
YAR064W	NA	6
YDR012W	RPL4B	6
YPL280W	HSP32	5
YBL079W	NUP170	5
YHR214C-E	NA	4
YFL051C	NA	4
YIR042C	NA	4
YCR038C	BUD5	4
YCR038W-A	NA	4
YPR195C	NA	4
YGL261C	PAU11	3
YGR293C	NA	3
YOR343W-A	NA	3
YPL265W	DIP5	3
YDR261W-A	NA	3
Q0110	BI2	3
YCL019W	NA	2
YBR300C	NA	2
YER190W	YRF1-2	2
YKR105C	VBA5	2
YGR270W	YTA7	2
YNR043W	MVD1	2
YOR388C	FDH1	2
YPL057C	SUR1	2
YML132W	COS3	2
YPL098C	MGR2	2
YBL108C-A	PAU9	2
YDL229W	SSB1	2
YGL262W	NA	2
YBL113W-A	NA	1
YJL220W	NA	1
YKR006C	MRPL13	1
YLR063W	BMT6	1
YBR295W	PCA1	1
YJL225C	NA	1
YAR068W	NA	1
YER189W	NA	1
YLR436C	ECM30	1
YBR166C	TYR1	1
YBR288C	APM3	1
YGR206W	MVB12	1
YJL158C	CIS3	1
YJR027W	NA	1
YKL181W	PRS1	1
YKR020W	VPS51	1
YLL028W	TPO1	1
YLR410W-A	NA	1
YML133C	NA	1
YNL333W	SNZ2	1
YDR216W	ADR1	1
YER040W	GLN3	1
YLR044C	PDC1	1
YOL166W-A	NA	1
YGL258W-A	NA	1
YNL054W-A	NA	1
YBL072C	RPS8A	1
YER156C	NA	1
YIL073C	SPO22	1
YLR053C	NA	1
YOR173W	DCS2	1
YPL141C	FRK1	1
YDR201W	SPC19	1
YDR374W-A	WIP1	1
YGR057C	LST7	1
YGR162W	TIF4631	1
YKL078W	DHR2	1
YKR011C	NA	1
YMR258C	ROY1	1
YOL041C	NOP12	1
YOR034C-A	NA	1
YHR219W	NA	1
YPL278C	NA	1
YPR204W	NA	1
YDR093W	DNF2	1
YNR076W	PAU6	1
YPR078C	NA	1
YCL011C	GBP2	1
YDR245W	MNN10	1
YDR283C	GCN2	1
YGL093W	SPC105	1
YGR065C	VHT1	1
YHR030C	SLT2	1
YJL128C	PBS2	1
YKR099W	BAS1	1
YOR004W	UTP23	1
YOR125C	CAT5	1
YBR175W	SWD3	1
YCR014C	POL4	1
YCR092C	MSH3	1
YFL013C	IES1	1
YHR102W	KIC1	1
YLR098C	CHA4	1
YNL038W	GPI15	1
YPL187W	MF(ALPHA)1	1
YNL144C	NA	1
YNL187W	SWT21	1
YPL181W	CTI6	1
YBL045C	COR1	1
YBL056W	PTC3	1
YDR207C	UME6	1
YEL071W	DLD3	1
YER070W	RNR1	1
YER077C	MRX1	1
YGL117W	NA	1
YGL259W	YPS5	1
YGR209C	TRX2	1
YHR096C	HXT5	1
YHR118C	ORC6	1
YIL109C	SEC24	1
YIL135C	VHS2	1
YJL097W	PHS1	1
YKR008W	RSC4	1
YKR100C	SKG1	1
YMR014W	BUD22	1
YMR112C	MED11	1
YMR186W	HSC82	1
YNL078W	NIS1	1
YNL099C	OCA1	1
YNL106C	INP52	1
YNL160W	YGP1	1
YNL267W	PIK1	1
YNR075W	COS10	1
YOR194C	TOA1	1
YOR274W	MOD5	1
YOR315W	SFG1	1
YOR355W	GDS1	1
YOR359W	VTS1	1
YOR383C	FIT3	1
YPL153C	RAD53	1
YPR017C	DSS4	1
YPR089W	NA	1
YGR289C	MAL11	1
YJR153W	PGU1	1
YML014W	TRM9	1
YPL105C	SYH1	1
YBR191W-A	NA	1
YDR027C	VPS54	1
YDR034C-A	NA	1
YDR168W	CDC37	1
YGL052W	NA	1
YGL233W	SEC15	1
YLR149C	NA	1
YML096W	NA	1
YPL218W	SAR1	1
YPR106W	ISR1	1
